# Supplementary material
Source: PubMed Central journal article supplement (PMC3977262)
Supplement: 1319203111_pnas.201319203SI.pdf [file 1319203111_pnas.201319203SI.pdf]

# Supporting Information

Neisius et al. 10.1073/pnas.1319203111

## SI Materials and Methods

**Lens Design and Fabrication.** The annular ring modification of the lens design delays the propagation of the outer portion of an incident plane wave generated by the EM coil by a time step

$$\Delta t = h \cdot \left( \frac{1}{c_0} - \frac{1}{c_l} \right), \quad [\text{S1}]$$

where  $c_l$  (2.40 km/s) and  $c_0$  (1.49 km/s) are the longitudinal (or P) wave speeds in the lens and water, respectively. The inner portion of the incident plane wave is refracted through the central, uncut region of the lens, forming the new leading lithotripter shock wave (LSW). Because of the reduced source aperture, the focal width (FW) of the leading LSW is broadened while superposition of the time-delayed wave with the leading LSW alters the pulse profile (1). The inner radius of the annulus ( $R_u = 56.2$  mm) determines the area ratio of uncut to total lens surface, that is,

$$AR = \frac{R_u^2 - R_i^2}{R_o^2 - R_i^2}, \quad [\text{S2}]$$

where  $R_i$  (16.9 mm) and  $R_o$  (68.6 mm) are radii of the lens aligned to the inner and outer edges of the coil within the source, respectively (Fig. 1C).

The acoustic focusing distances produced by spherical and ellipsoidal lens surface modifications were estimated using a multiphysics computational model of wave propagation. The model employs a finite-volume conservation law Riemann solver (2) within the BEARCLAW framework developed by S.M. and solves the linear elasticity and Euler equations simultaneously to simulate wave propagation within the focusing lens and water domains, respectively. Input plane wave pressure for the numerical model was measured using a fiber optic probe hydrophone (FOPH) and curve-fitted as described previously (3). As a derivation of FOPH measurements, uncertainty in numerical model results is 5% at minimum (4).

The 3D shape of the acoustic lens was designed using Autodesk Inventor CAD software and then exported to MasterCam (CNC Software), where the material removal machining motions were programmed. Using a Centroid CNC lathe and carbide turning tools, the excess material was removed in 2-mm steps to form the shape of the new lens. After machining, all surfaces of the lens were polished using an ultrafine aluminum silicate polishing pad (Scotch Brite 9767; 3M).

**In Vitro Characterization of Lenses.** Acoustic fields produced by the original and new lenses were characterized using the FOPH, which was fastened to a 3D positioning stage controlled remotely using a program written in MATLAB (MathWorks). The axisymmetric electromagnetic (EM) shock source with either the original or new lens was mounted at the base of a Lucite tank (length  $\times$  width  $\times$  height, 43  $\times$  39  $\times$  29 cm) filled with 0.2- $\mu$ m-filtered and degassed water ( $<3$  mg/L  $O_2$  concentration,  $\sim 21^\circ\text{C}$ ). Pressure waveforms were measured in four quadrants in the lithotripter focal plane using radial step sizes of 1 mm ( $0 < r < 6$  mm) and 2 mm ( $6 < r < 14$  mm). Along the lithotripter ( $z$ ) axis, pressure waveforms were measured in 5-mm intervals ( $-20$  mm  $< z < +20$  mm) and 10-mm intervals ( $-60$  mm  $< z < -20$  mm and  $+20$  mm  $< z < +60$  mm). FOPH waveforms were recorded at 100-MHz sampling frequency using a LeCroy Waverunner 6050a

digital oscilloscope (Teledyne LeCroy) and transferred for off-line calibration and postprocessing using MATLAB.  $FW$  was calculated as the full width at half maximum peak pressure ( $p_+$ ), and the derived total acoustic pulse energy was determined by

$$E_{tot} = \frac{2\pi}{Z_0} \cdot \int_0^{R_c} \int_{t_1}^{t_2} p_a(r,t)^2 \cdot r dt dr, \quad [\text{S3}]$$

where  $Z_0$  (1.5 MRays) is the acoustic impedance of water,  $R_c$  (6 mm) is a radius encompassing most stones treated with shock wave lithotripsy (SWL),  $p_a(r,t)$  is acoustic pressure from the LSW, and time values ( $t_1$  and  $t_2$ ) are the first and final crossing points of 10% of the local  $p_+$  by the  $p_a(r,t)$ . Eq. S3 is also used to calculate compressive and secondary acoustic pulse energies, with  $t_1$  and  $t_2$  defined as the first and final crossing points of 10% of the local  $p_+$  by the applicable wave section.

**In Vitro Stone Comminution.** In membrane holder experiments, a 20-gauge syringe needle sandwiched between the edge of two membranes (Fig. S24) was used to allow for pressure release inside the membrane holder, which reduces fluid and fragment mixing effects during SWL (5). In simulated respiratory motion experiments, the 3D positioning system was used to translate the flat-base tube holder along a single horizontal axis within the lithotripter focal plane during SWL. Four different phases of respiration (i.e., inspiration, inspiration pause, expiration, and expiration pause) were simulated following typical kidney motion patterns observed in patients (6). The holder was translated in the inferior direction (away from the lithotripter focus) during inspiration and returned in the superior direction to the focal region during expiration (Fig. 4C). The simulated breath rate (12 breaths per minute) and excursion distances ( $D = 5$  or 15 mm) were representative of kidney displacement in patients during SWL under heavy or light sedation, respectively (7). Randomization factors were incorporated to avoid discrete translation patterns. Histograms of the motion patterns used during comminution tests were statistically similar between the two lenses (Fig. 4C).

**In Vivo Stone Comminution.** Female farm pigs with an approximate weight of 50 kg were used as animal models because their kidney size and anatomy are similar to those of human kidneys (8). Eleven pigs were used to compare fragmentation efficiency produced by the Siemens Modularis EM lithotripter using either the original or new lens. Animals were placed under general endotracheal anesthesia and shaved along their flanks to improve coupling quality across the skin surface. Subsequently, animals were transferred to an operation table for midline laparotomy. After bowel mobilization, the retroperitoneal space was opened to expose the proximal ureter close to the renal pelvis. A proximal ureterotomy of  $\sim 1$  cm was performed, and a cylindrical BegoStone phantom was inserted and guided into the renal pelvis (Fig. 5A). Through the existing ureterotomy, a 6-french polyurethane double-J ureteral stent (Boston Scientific) was advanced into the renal pelvis to prevent stone and fragment migration to the ureter during and after SWL. The ureterotomy was closed with a 4/0 running monofilament suture. This procedure was repeated on the opposite kidney. After closing the laparotomy, the animal was transferred to the lithotripsy table.

Before SWL, ultrasound gel (Medline) was applied on the coupling bellow of the shock head, and the lithotripter focus was
